# Supplementary material for: Rapid synthesis of highly luminescent InP and InP/ZnS nanocrystals
Source: Royal Society of Chemistry journal article supplement (doi:10.1039/b803263g), 2008-01-01
Supplement: b803263g.pdf [file b803263g.pdf]

# Rapid synthesis of highly luminescent

## InP and InP/ZnS nanocrystals

*Shu Xu, Jan Ziegler and Thomas Nann\**

School of Chemical Science and Pharmacy, University of East Anglia, NR4 7TJ, Norwich, UK.

E-mail: [T.Nann@uea.ac.uk](mailto:T.Nann@uea.ac.uk)

# 1. EDXS characterization for InP and InP/ZnS nanocrystals.

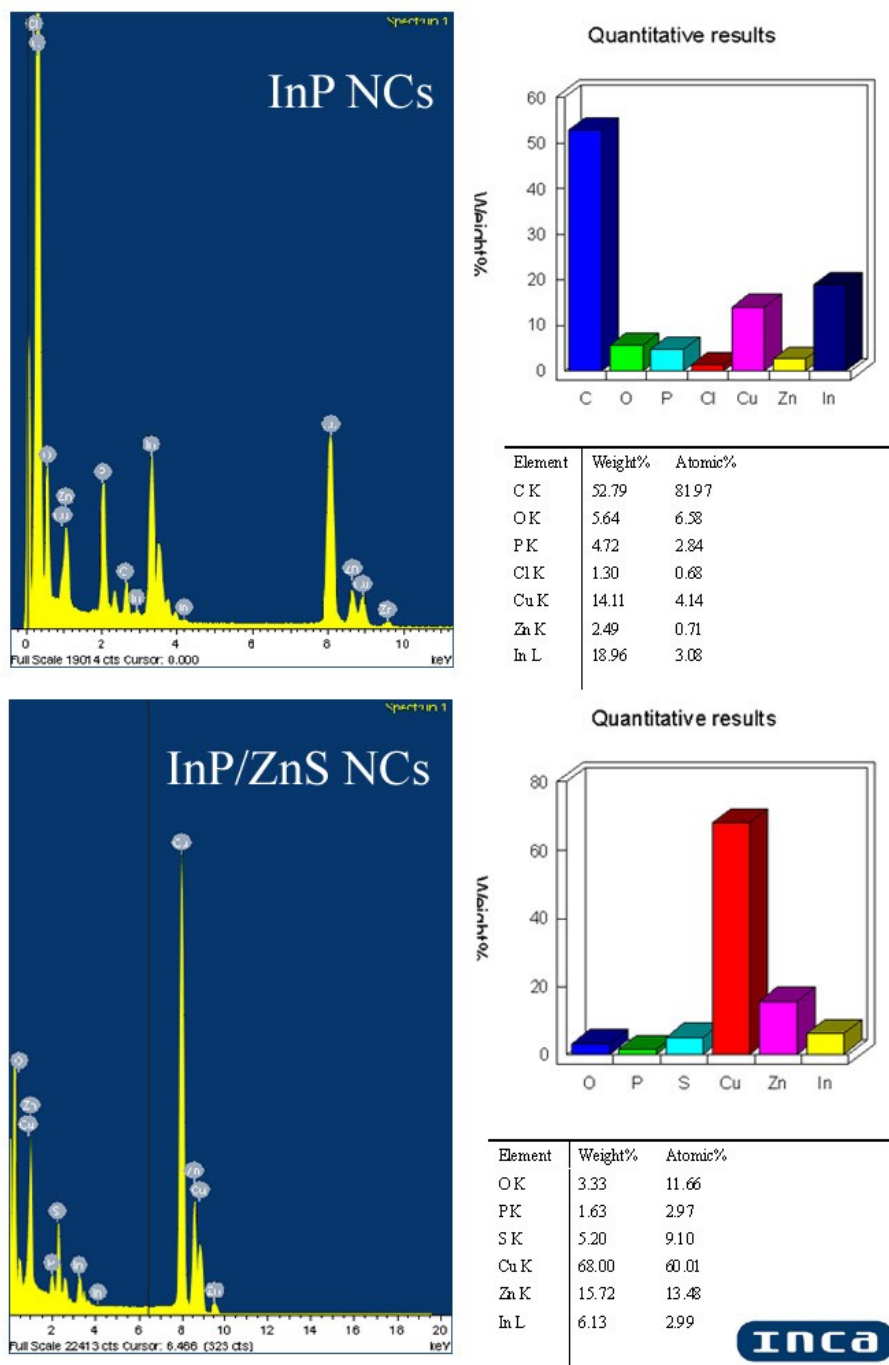

**Figure S.1:** The EDXS results for the zinc carboxylate capped InP NCs and InP/ZnS NCs. Elemental analysis showed a molar ratio In : P : Zn of  $\sim 1 : 0.93 : 0.23$  for a zinc carboxylate capped InP NCs and In : P : Zn : S of  $\sim 1 : 0.99 : 4.5 : 3.0$  for a InP/ZnS shelled NCs. The results indicated zinc rich particle surfaces.

## 2. The influence of HDA concentration to the growth of InP nanocrystals

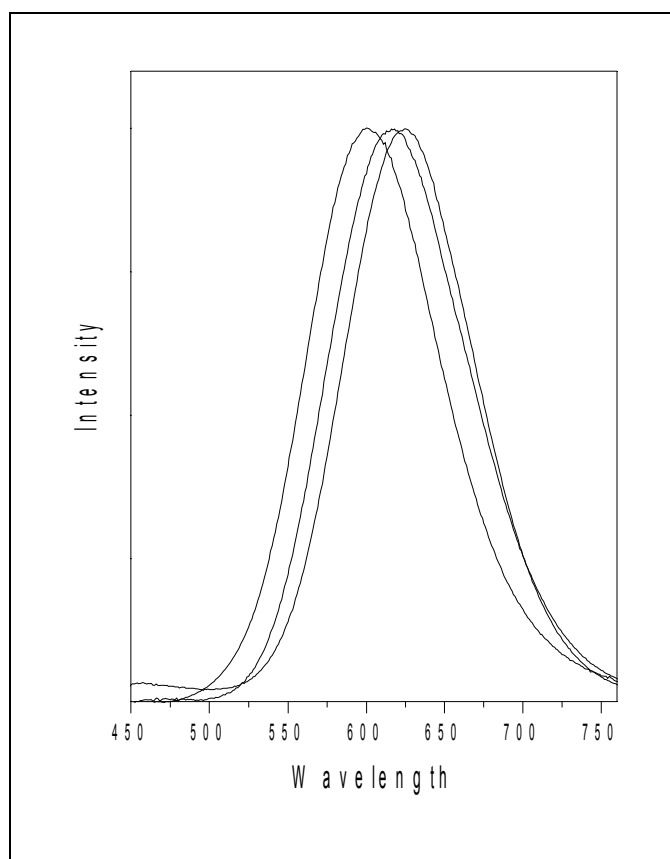

**Figure S.2:** The PL spectra of the InP NCs prepared with different concentrations of HDA. The reaction solution contained 0.1 mmol  $\text{InCl}_3$ , 0.1 mmol ZnUA and 0.1 mmol SA. The amount of HDA for each sample is (from left to right): 0.5 mmol, 0.35 mmol, 0.2 mmol.

The concentration of HDA had a much weaker effect on the crystal growth and size distribution of the NCs. With a change of the initial amount from 0.2 mmol to 0.5 mmol, the final PL emission wavelength of the NCs shifted by only 40 nm.

## 3. The quantum yields of differently sized InP/ZnS NCs in figure 3 (paper).

| Emission wavelength | 480 nm | 515 nm | 545 nm | 575 nm | 610 nm | 660 nm | 700 nm | 735 nm |
|---------------------|--------|--------|--------|--------|--------|--------|--------|--------|
| Quantum yields      | 20 %   | 32 %   | 43 %   | 52 %   | 58 %   | 48 %   | 45 %   | 40 %   |

#### 4. The XRD characterization for InP/ZnS nanocrystals

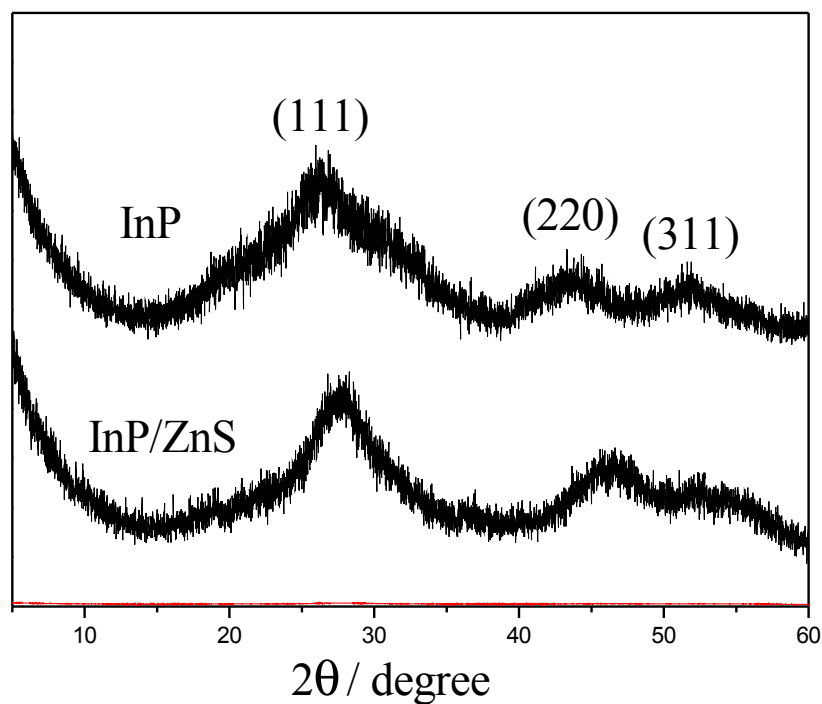

**Figure S.3:** The peaks in the XRD pattern of InP/ZnS core/shell samples shift to resemble the XRD pattern of ZnS and no mixed peaks of ZnS or InP NCs were found, indicating pure InP/ZnS particles. Narrow peak of InP/ZnS NCs comparing to InP NCs also showed the bigger size.

## 5. FT-IR characterization for InP NCs.

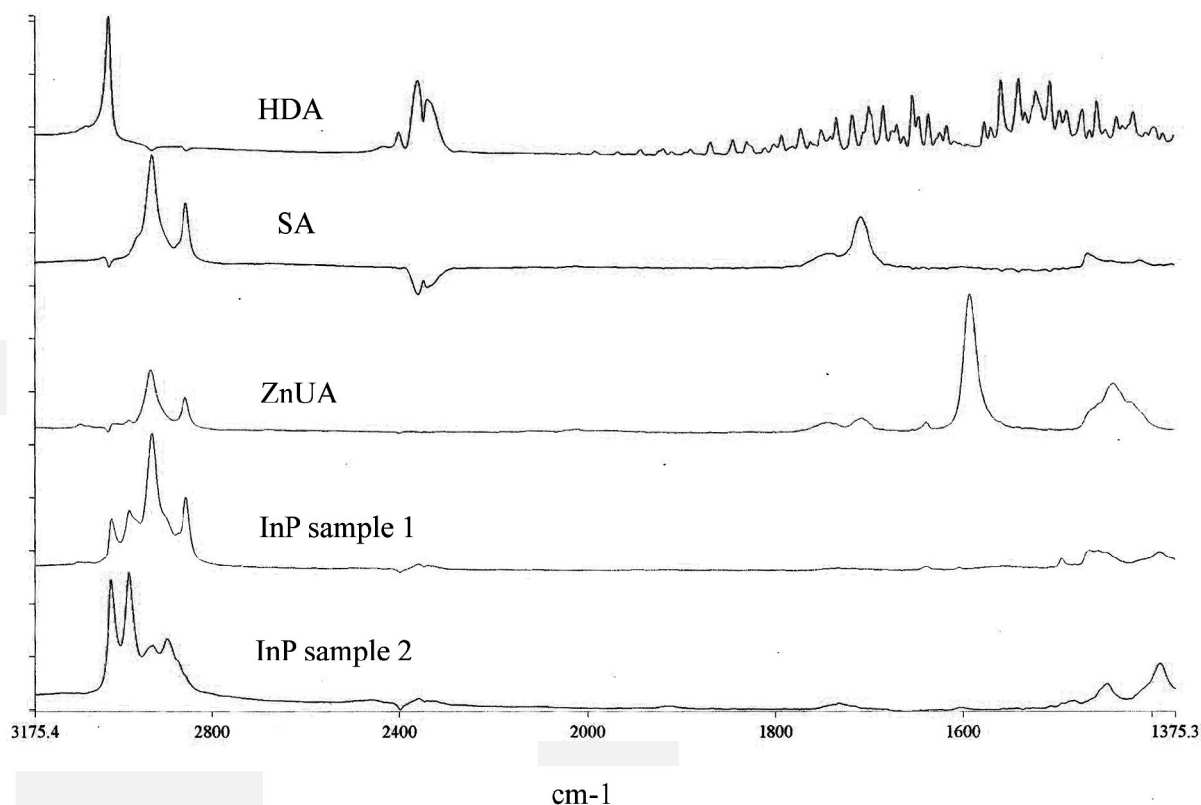

**Figure S.4:** The FT-IR spectra of the ligands as well as chloroformic InP NCs solutions were measured. InP sample 1 was prepared with an initial HDA: SA: In:P:ZnUA ratio of 2:2:1:1:1, InP sample 2 was prepared with an initial HDA:SA:In:P:ZnUA ratio of 4:0:1:1:1. The C-N peak at 3015 cm<sup>-1</sup> in HDA still appeared in InP NCs samples and had about 10 cm<sup>-1</sup> shift. The peak in ZnUA at 1607 cm<sup>-1</sup> appeared in InP NCs and had about 10 cm<sup>-1</sup> shift. FT-IR proved that the HDA and zinc carboxylate were both situated on the surface of the InP NCs.
